# Supplementary material
Source: publisher site journal article supplement (https://www.dovepress.com/get_supplementary_file.php?f=373030.docx)
Supplement: Supplementary file 1 [file get_supplementary_file.php]

Supplementary Material


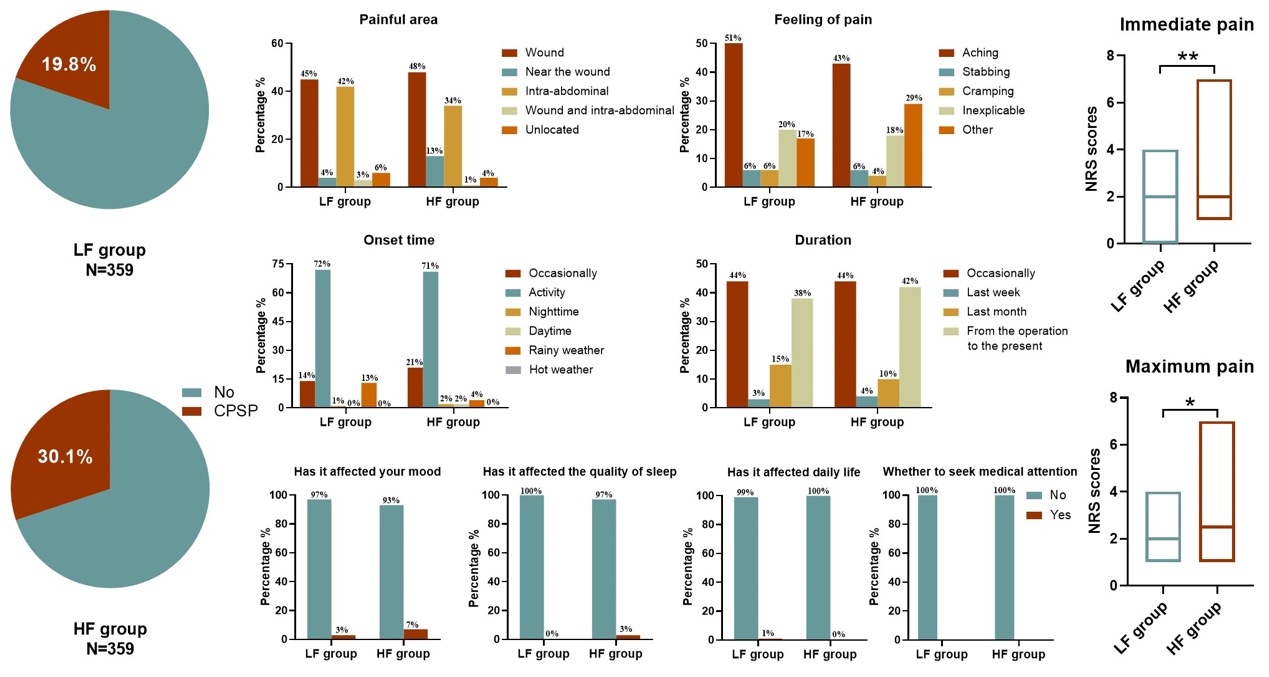
**1. Figure S1**

Figure S1. The pain features of CPSP at threemonths after CS in the LF group and the HF group.

**P<0.01; *P<0.05. Mood: whether the patient’s mood was affected by pain; quality of sleep: whether their quality of sleep was affected by pain; daily life: whether their normal daily life was affected by pain. CPSP, chronic postsurgical pain; CS, cesarean section; LF, low frequency; HF, high frequency.

**2. Figure S2**


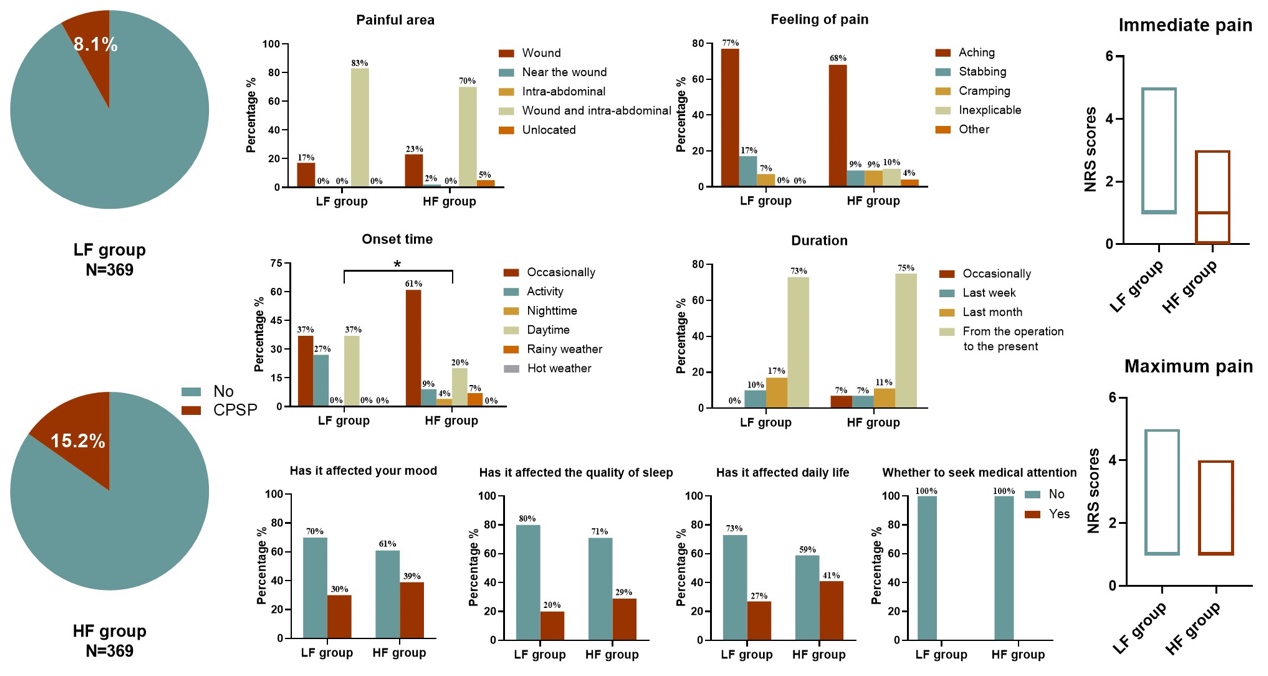


Figure S2. The pain features of CPSP at one year after CS in the LF group and the HF group.

*P<0.05. Mood: whether the patient’s mood was affected by pain; quality of sleep: whether their quality of sleep was affected by pain; daily life: whether their normal daily life was affected by pain. CPSP, chronic postsurgical pain; CS, cesarean section; LF, low frequency; HF, high frequency.
